# Supplementary material
Source: PubMed Central journal article supplement (PMC4993648)
Supplement: NIHMS753663-supplement-1.pdf [file NIHMS753663-supplement-1.pdf]

**Table S1**  
***Drosophila* Homologs of DISC1 Interacting Proteins**

| Human chromosome | Interactors  | HGNC  | UniProtKB | Protein Name                                                     | DISC1 Interaction |   |    | <i>Drosophila</i> Homologs                                   |
|------------------|--------------|-------|-----------|------------------------------------------------------------------|-------------------|---|----|--------------------------------------------------------------|
|                  |              |       |           |                                                                  | FL                | N | TR |                                                              |
| 1                | GNB1         | 4396  | P62873    | Guanine nucleotide-binding protein G(I)/G(S)/G(T) subunit beta-1 | -                 | + | -  | G protein $\beta$ -subunit 13F                               |
|                  | KIAA0470     | 28920 | Q5SW79    | Centrosomal protein of 170 kDa                                   | +                 | + | -  | Mucin 68D                                                    |
|                  | KIFAP3       | 17060 | Q92845    | Kinesin-associated protein 3                                     | -                 | + | -  | Kinesin associated protein 3                                 |
|                  | MGC45441     | 28688 | Q8N4L8    | Coiled-coil domain-containing protein 24                         | -                 | - | +  | Cytoplasmic linker protein 190                               |
|                  | MACF1        | 13664 | Q9UPN3    | Microtubule-actin cross-linking factor 1, isoforms 1/2/3/5       | +                 | + | +  | short stop                                                   |
| 2                | PDE4B        | 8781  | Q07343    | cAMP-specific 3',5'-cyclic phosphodiesterase 4B                  | +                 | - | -  | dunce                                                        |
|                  | C2orf4       | 14014 | Q9Y316    | Protein MEMO1                                                    | -                 | + | -  | CG8031                                                       |
|                  | DCTN1        | 2711  | Q14203    | Dynactin subunit 1                                               | -                 | - | +  | Glued                                                        |
|                  | FBXO41       | 29409 | Q8TF61    | F-box only protein 41                                            | +                 | - | -  | CG9003                                                       |
|                  | IMMT         | 6047  | Q16891    | Mitochondrial inner membrane protein                             | -                 | + | +  | CG6455                                                       |
|                  | KIAA1212     | 25523 | Q3V6T2    | Girdin                                                           | +                 | + | -  | Girdin                                                       |
|                  | KIF3C        | 6321  | O14782    | Kinesin-like protein KIF3C                                       | -                 | + | +  | Kinesin-like protein at 68D                                  |
|                  | MYT1L        | 7623  | Q9UL68    | Myelin transcription factor 1-like protein                       | +                 | - | -  | CG43689                                                      |
|                  | SPTBN1       | 11275 | Q01082    | Spectrin beta chain, non-erythrocytic 1                          | +                 | + | +  | $\beta$ Spectrin                                             |
|                  | TRAF3IP1     | 17861 | Q8TDR0    | TRAF3-interacting protein 1                                      | +                 | + | +  | CG3259                                                       |
| 3                | YWHAQ        | 12854 | P27348    | 14-3-3 protein theta                                             | -                 | - | +  | 14-3-3 $\zeta$                                               |
|                  | ARIH2        | 690   | O95376    | E3 ubiquitin-protein ligase ARIH2                                | -                 | + | -  | ariadne 2                                                    |
|                  | FLJ13386     | 25815 | Q96MT8    | Centrosomal protein of 63 kDa                                    | +                 | - | -  | zipper sti                                                   |
|                  | KALRN        | 4814  | O60229    | Kalirin                                                          | -                 | - | +  | trio                                                         |
|                  | SH3BP5       | 10827 | O60239    | SH3 domain-binding protein 5                                     | +                 | + | -  | parcas                                                       |
|                  | SRGAP2       | 19751 | O75044    | SLIT-ROBO Rho GTPase-activating protein 2                        | -                 | - | +  | -                                                            |
|                  | TNIK         | 30765 | Q9UKE5    | TRAF2 and NCK-interacting protein kinase                         | +                 | + | -  | misshapen                                                    |
| 4                | ZNF197       | 12988 | O14709    | Zinc finger protein 197                                          | -                 | + | -  | crooked legs                                                 |
|                  | KIAA0826     | 29127 | O94915    | Protein furry homolog-like                                       | +                 | + | -  | furry                                                        |
|                  | SEC3L1       | 30380 | Q9NV70    | Exocyst complex component 1                                      | +                 | - | +  | Sec3 ortholog                                                |
|                  | SPARCL1      | 11220 | Q14515    | SPARC-like protein 1                                             | -                 | - | +  | BM-40-SPARC                                                  |
| 5                | STX18        | 15942 | Q9P2W9    | Syntaxin-18                                                      | -                 | - | +  | Syntaxin 18                                                  |
|                  | DPYSL3       | 3015  | Q14195    | Dihydropyrimidinase-related protein 3                            | -                 | + | -  | Collapsin Response Mediator Protein                          |
|                  | KIF3A        |       | Q9Y496    | Kinesin-like protein KIF3A                                       | -                 | + | +  | Kinesin-like protein at 64D                                  |
|                  | MATR3        | 6912  | P43243    | Matrin-3                                                         | -                 | + | -  | Sh3 $\beta$                                                  |
| 6                | TRIO         | 17009 | Q9H2D6    | TRIO and F-actin-binding protein                                 | +                 | + | +  | trio                                                         |
|                  | C6orf182     | 21561 | Q81YX8    | Centrosomal protein CEP57L1                                      | -                 | - | +  | CENP-meta rudhira                                            |
|                  | CDC5L        | 1743  | Q99459    | Cell division cycle 5-like protein                               | +                 | + | -  | Cell division cycle 5 ortholog                               |
|                  | DST          | 1090  | Q03001    | Dystonin                                                         | +                 | + | +  | short stop                                                   |
|                  | TIAM2        | 11806 | Q81VF5    | T-lymphoma invasion and metastasis-inducing protein 2            | -                 | + | -  | still life                                                   |
|                  | TUBB         | 20778 | P07437    | Tubulin beta chain                                               | -                 | + | -  | betaTub85D                                                   |
| 7                | UTRN         | 12635 | P46939    | Utrophin                                                         | -                 | - | +  | Dystrophin                                                   |
|                  | AKAP9        | 379   | Q99996    | A-kinase anchor protein 9                                        | +                 | + | -  | Stretchin-Mlck                                               |
|                  | DKFZP434G156 | 22225 | Q96JN2    | Coiled-coil domain-containing protein 136                        | -                 | - | +  | Cytoplasmic linker protein 190                               |
| 8                | CLU          | 2095  | P10909    | Clusterin                                                        | +                 | + | +  | -                                                            |
|                  | DPYSL2       | 3014  | Q16555    | Dihydropyrimidinase-related protein 2                            | -                 | + | -  | Collapsin Response Mediator Protein                          |
|                  | EIF3S3       | 3273  | O15372    | Eukaryotic translation initiation factor 3 subunit H             | +                 | + | -  | Eukaryotic initiation factor 3 p40 subunit                   |
|                  | RAD21        | 9811  | O60216    | Double-strand-break repair protein rad21 homolog                 | +                 | + | -  | verthandi                                                    |
|                  | TNKS         | 11941 | O95271    | Tankyrase-1                                                      | -                 | + | -  | tankyrase                                                    |
|                  | YWHAZ        | 12855 | P63104    | 14-3-3 protein zeta/delta                                        | -                 | - | +  | 14-3-3 $\zeta$                                               |
| 9                | AGTPBP1      | 17258 | Q9UPW5    | Cytosolic carboxypeptidase 1                                     | -                 | + | -  | <i>Drosophila</i> Nna1 ortholog                              |
|                  | OLFM1        | 17187 | Q99784    | Noelin                                                           | +                 | + | -  | CG6867                                                       |
|                  | RABGAP1      | 17155 | Q9Y3P9    | Rab GTPase-activating protein 1                                  | -                 | + | -  | GTPase activating protein and centrosome-associated ortholog |
|                  | SMC2L1       | 14011 | O95347    | Structural maintenance of chromosomes protein 2                  | -                 | - | +  | SMC2                                                         |
|                  | SPTAN1       | 11273 | Q13813    | Spectrin alpha chain, non-erythrocytic 1                         | -                 | + | -  | $\alpha$ Spectrin                                            |
| 10               | TUBB2        | 12412 | Q13885    | Tubulin beta-2A chain                                            | -                 | + | -  | betaTub85D                                                   |
|                  | XPNPEP1      | 12822 | Q9NQW7    | Xaa-Pro aminopeptidase 1                                         | +                 | + | -  | Aminopeptidase P                                             |
|                  | ZNF365       | 18194 | Q70YC5    | Protein ZNF365                                                   | +                 | - | -  | -                                                            |

|       |           |        |                        |                                                                                               |   |   |         |                                    |
|-------|-----------|--------|------------------------|-----------------------------------------------------------------------------------------------|---|---|---------|------------------------------------|
| 11    | NUP160    | 18017  | Q12769                 | Nuclear pore complex protein Nup160                                                           | - | + | +       | Nucleoporin 160kD                  |
| 12    | BICD1     | 1049   | Q96G01                 | Protein bicaudal D homolog 1                                                                  | - | + | -       | Bicaudal D                         |
|       | DCTN2     | 2712   | Q13561                 | Dynactin subunit 2                                                                            | + | - | +       | Dynamitin                          |
|       | MGC4170   | 29670  | Q3T906                 | N-acetylglucosamine-1-phosphotransferase subunits alpha/beta                                  | - | - | +       | CG8027                             |
| 13    | -         | -      | -                      | -                                                                                             | - | - | -       |                                    |
| 14    | C14orf135 | 20349  | Q63HM2                 | Pecanex-like protein 4                                                                        | - | + | -       | pecanex                            |
|       | C14orf166 | 23169  | Q9Y224                 | UPF0568 protein C14orf166                                                                     | - | - | +       | CG31249                            |
|       | DNCH1     | 2961   | Q14204                 | Cytoplasmic dynein 1 heavy chain 1                                                            | - | + | +       | Dynein heavy chain 64C             |
|       | SNX6      | 14970  | Q9UNH7                 | Sorting nexin-6                                                                               | + | - | -       | Sorting nexin 6                    |
| 15    | MN7       | 4870   | -                      | hect domain and RLD 2 pseudogene 2                                                            | + | - | -       | -                                  |
| 16    | FLJ22386  | 29478  | Q9GZN7                 | Protein rogdi homolog                                                                         | + | - | -       | rogdi                              |
| 17    | ACTG1     | 144    | P63261                 | Actin, cytoplasmic 2                                                                          | - | + | -       | Actin 5C<br>Actin 42A              |
|       | CDK5RAP3  | 18673  | Q96JB5                 | CDK5 regulatory subunit-associated protein 3                                                  | + | + | -       | CG30291                            |
|       | DNAJC7    | 12392  | Q99615                 | DnaJ homolog subfamily C member 7                                                             | - | + | +       | Tetratricopeptide repeat protein 2 |
|       | EXOC7     | 23214  | Q9UPT5                 | Exocyst complex component 7                                                                   | + | - | -       | Exo70 ortholog                     |
|       | NDEL1     | 17620  | Q9GZM8                 | Nuclear distribution protein nudE-like 1                                                      | + | + | -       | nudE                               |
|       | PFAH1B1   | 8574   | P43034                 | Platelet-activating factor acetylhydrolase IB subunit alpha                                   | + | + | -       | Lissencephaly-1                    |
|       | PPM1E     | 19322  | Q8WY54                 | Protein phosphatase 1E                                                                        | - | + | -       | CG10376                            |
|       | PPP4R1    | 9320   | Q8TF05                 | Serine/threonine-protein phosphatase 4 regulatory subunit 1                                   | - | + | -       | -                                  |
|       | SMARCE1   | 11109  | Q969G3                 | SWI/SNF-related matrix-associated actin-dependent regulator of chromatin subfamily E member 1 | + | - | -       | dalao                              |
| YWHAE | 12851     | P62258 | 14-3-3 protein epsilon | -                                                                                             | + | + | 14-3-3ε |                                    |
| 18    | -         | -      | -                      | -                                                                                             | - | - | -       |                                    |
| 19    | EEF2      | 3214   | P13639                 | Elongation factor 2                                                                           | - | + | -       | Elongation factor 2                |
|       | PPP5C     | 9322   | P53041                 | Serine/threonine-protein phosphatase 5                                                        | - | - | +       | Protein phosphatase D3             |
| 20    | CRNKL1    | 15762  | Q9BZJ0                 | Crooked neck-like protein 1                                                                   | - | + | -       | crooked neck                       |
|       | XRN2      | 12836  | Q9H0D6                 | 5'-3' exoribonuclease 2                                                                       | - | + | -       | Rat1                               |
| 21    | -         | -      | -                      | -                                                                                             | - | - | -       |                                    |
| 22    | C22orf1   | 1306   | O15442                 | Metallophosphoesterase domain-containing protein 1                                            | - | + | -       | CG16717                            |
|       | TFIP11    | 17165  | Q9UBB9                 | Tuftelin-interacting protein 11                                                               | - | + | +       | septin interacting protein 1       |
| X     | DMD       | 2928   | P11532                 | Dystrophin                                                                                    | + | - | -       | Dystrophin                         |
|       | GPRASP2   | 25169  | Q96D09                 | G-protein coupled receptor-associated sorting protein 2                                       | - | + | -       | CG3108<br>nahoda                   |
|       | PGK1      | 8896   | P00558                 | Phosphoglycerate kinase 1                                                                     | + | - | -       | Phosphoglycerate kinase            |
| Y     | -         | -      | -                      | -                                                                                             | - | - | -       |                                    |

Interacting proteins and the DISC1 domains are according to Camargo et al., 2007. Note that 92% (75/82) of the genes encoding the DISC1 interacting proteins have homologs in the fly genome.

Supplementary Information

Table S2

Subcellular Localization of Intact and Mutant DISC1 proteins in MB Neurons

|                   | Nuclear<br>(punctate) | Nuclear<br>(diffuse) | Perinuclear<br>cytoplasm | Dendrites | Axons     |
|-------------------|-----------------------|----------------------|--------------------------|-----------|-----------|
| <b>FL (1-854)</b> | <b>++</b>             | <b>+</b>             | <b>+</b>                 | <b>-</b>  | <b>-</b>  |
| <b>1-597</b>      | <b>-</b>              | <b>++</b>            | <b>+</b>                 | <b>+</b>  | <b>+</b>  |
| <b>1-402</b>      | <b>-</b>              | <b>+</b>             | <b>-</b>                 | <b>-</b>  | <b>-</b>  |
| <b>46-854</b>     | <b>-</b>              | <b>-</b>             | <b>++*</b>               | <b>++</b> | <b>++</b> |
| <b>245-854</b>    | <b>-</b>              | <b>-</b>             | <b>+</b>                 | <b>+</b>  | <b>+</b>  |
| <b>291-854</b>    | <b>-</b>              | <b>-</b>             | <b>++*</b>               | <b>++</b> | <b>++</b> |
| <b>Δ349-402</b>   | <b>-</b>              | <b>+</b>             | <b>++</b>                | <b>+</b>  | <b>-</b>  |
| <b>mtNLS1</b>     | <b>-</b>              | <b>-</b>             | <b>++*</b>               | <b>++</b> | <b>++</b> |

Removal of different parts of the DISC1 protein resulted in different localization patterns in developing MB neurons. The intact DISC1 protein FL (1-854) exhibited punctate nuclear dots as well as diffuse nuclear and perinuclear localization. Mutant proteins, 1-597, 1-402 and Δ349-402, exhibited diffuse nuclear pattern. Mutant proteins (asterisk), 291-854, mtNLS1 and 46-854, exhibited punctate perinuclear accumulation in the cytoplasm albeit less prominent with 46-854. Mutant protein 1-402 rarely showed perinuclear cytoplasmic localization. Localization in dendrites (calyx) or in axons (lobes) was undetectable for the intact DISC1 protein FL (1-854) and mutant 1-402. By contrast, dendritic and axonal localization was detected for mutant proteins 1-597, 46-854, 245-854, 291-854 and mNLS1. Only dendritic localization was detected for Δ349-402.

Table S3

## Olfactory Response Indices of DISC1 and Control Larvae after Associative Training

| Genotype                  | LIN/DW        | n  | LIN/SUC         | n  |
|---------------------------|---------------|----|-----------------|----|
| <i>FL-6-3 / 201Y</i>      | 0.384 ± 0.026 | 16 | 0.386 ± 0.026   | 16 |
| <i>FL-6-3 / w (CS10)</i>  | 0.368 ± 0.039 | 17 | **0.530 ± 0.029 | 14 |
| <i>FL-6-6 / 201Y</i>      | 0.181 ± 0.023 | 15 | 0.190 ± 0.037   | 16 |
| <i>FL-6-6 / w (CS10)</i>  | 0.271 ± 0.036 | 16 | **0.433 ± 0.036 | 16 |
| <i>1-597 / 201Y</i>       | 0.346 ± 0.041 | 16 | 0.364 ± 0.049   | 16 |
| <i>1-597 / w (CS10)</i>   | 0.355 ± 0.036 | 17 | **0.486 ± 0.030 | 17 |
| <i>46-854 / 201Y</i>      | 0.405 ± 0.035 | 12 | 0.432 ± 0.034   | 12 |
| <i>46-854 / w (CS10)</i>  | 0.478 ± 0.036 | 11 | **0.624 ± 0.033 | 11 |
| <i>291-854 / 201Y</i>     | 0.323 ± 0.033 | 32 | **0.441 ± 0.035 | 32 |
| <i>291-854 / w (CS10)</i> | 0.330 ± 0.042 | 19 | *0.470 ± 0.031  | 19 |
| <i>w (CS10)</i>           | 0.308 ± 0.029 | 17 | **0.459 ± 0.033 | 16 |
| <i>201Y / 201Y</i>        | 0.237 ± 0.032 | 20 | **0.384 ± 0.028 | 21 |
| <i>201Y /w (CS10)</i>     | 0.182 ± 0.041 | 19 | **0.351 ± 0.032 | 23 |

Larvae were trained either with 1M SUC (LIN/SUC) or with DW (LIN/DW) in the presence of linalool (LIN). Olfactory response toward linalool was then determined. Associative memory, as measured by the increment in RI toward linalool, was suppressed in larvae expressing the intact DISC1 protein, *FL-6-3/201Y* and *FL-6-6/201Y*. Associative memory was also suppressed in larvae expressing *1-597/201Y* and *46-854/201Y* but not *291-854/201Y*. Normal memory performance was observed for larvae lacking the *201Y-GAL4* driver. \*p < 0.05, \*\*p < 0.01 by Student's t-test between LIN/SUC and LIN/DW.



Supplementary Information

Table S4

Sensory Acuities of DISC1 and Control Larvae

| Genotype                  | Olfactory Response     | n  | Gustatory Response   | n  |
|---------------------------|------------------------|----|----------------------|----|
| <i>FL-6-3 / 201Y</i>      | * <b>0.577 ± 0.025</b> | 16 | <b>0.366 ± 0.029</b> | 12 |
| <i>FL-6-3 / w (CS10)</i>  | <b>0.415 ± 0.054</b>   | 14 | <b>0.404 ± 0.031</b> | 12 |
| <i>FL-6-6 / 201Y</i>      | <b>0.385 ± 0.026</b>   | 16 | <b>0.379 ± 0.026</b> | 11 |
| <i>FL-6-6 / w (CS10)</i>  | <b>0.444 ± 0.029</b>   | 15 | <b>0.321 ± 0.048</b> | 10 |
| <i>1-597 / 201Y</i>       | <b>0.456 ± 0.039</b>   | 16 | <b>0.410 ± 0.030</b> | 15 |
| <i>1-597 / w (CS10)</i>   | <b>0.519 ± 0.024</b>   | 17 | <b>0.425 ± 0.060</b> | 10 |
| <i>46-854 / 201Y</i>      | <b>0.390 ± 0.048</b>   | 8  | <b>0.496 ± 0.032</b> | 7  |
| <i>46-854 / w (CS10)</i>  | <b>0.501 ± 0.059</b>   | 7  | <b>0.489 ± 0.071</b> | 7  |
| <i>291-854 / 201Y</i>     | <b>0.310 ± 0.050</b>   | 8  | <b>0.479 ± 0.038</b> | 8  |
| <i>291-854 / w (CS10)</i> | <b>0.298 ± 0.051</b>   | 19 | <b>0.467 ± 0.038</b> | 8  |
| <i>w (CS10)</i>           | <b>0.419 ± 0.048</b>   | 17 | <b>0.343 ± 0.038</b> | 12 |
| <i>201Y / 201Y</i>        | <b>0.470 ± 0.035</b>   | 16 | <b>0.405 ± 0.041</b> | 12 |
| <i>201Y /w (CS10)</i>     | <b>0.464 ± 0.030</b>   | 18 | <b>0.411 ± 0.023</b> | 17 |

Olfactory and gustatory responses of naïve larvae. No significant defect in olfactory response was observed in *DISC1* larvae. The naïve olfactory responses of *FL-6-3 / 201Y* larvae were slightly higher than *w (CS10)* larvae; \*p < 0.05, one-way ANOVA followed by Dunnett's post hoc test compared to *w (CS10)*. Gustatory response to 1M sucrose was also normal for all animals. Errors are Standard Error of the Means. All lines were backcrossed against *w (CS10)* at least five times.

**A**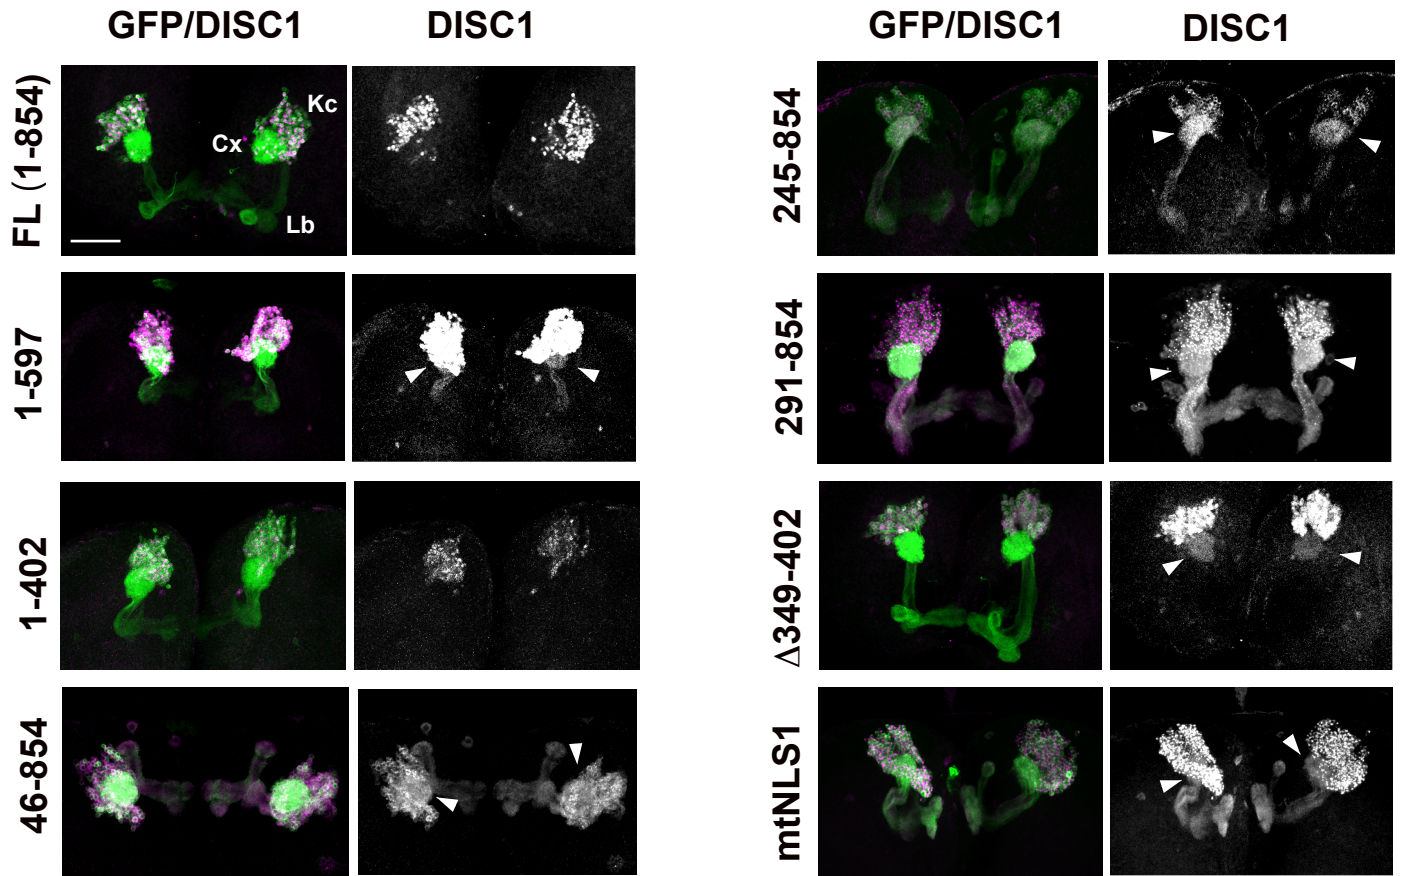**B**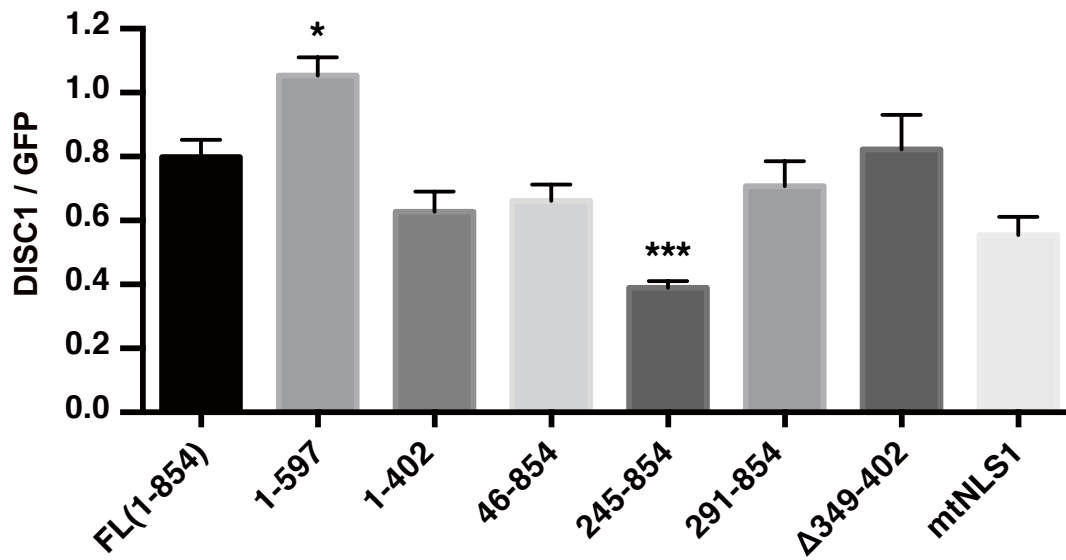**Figure S1**

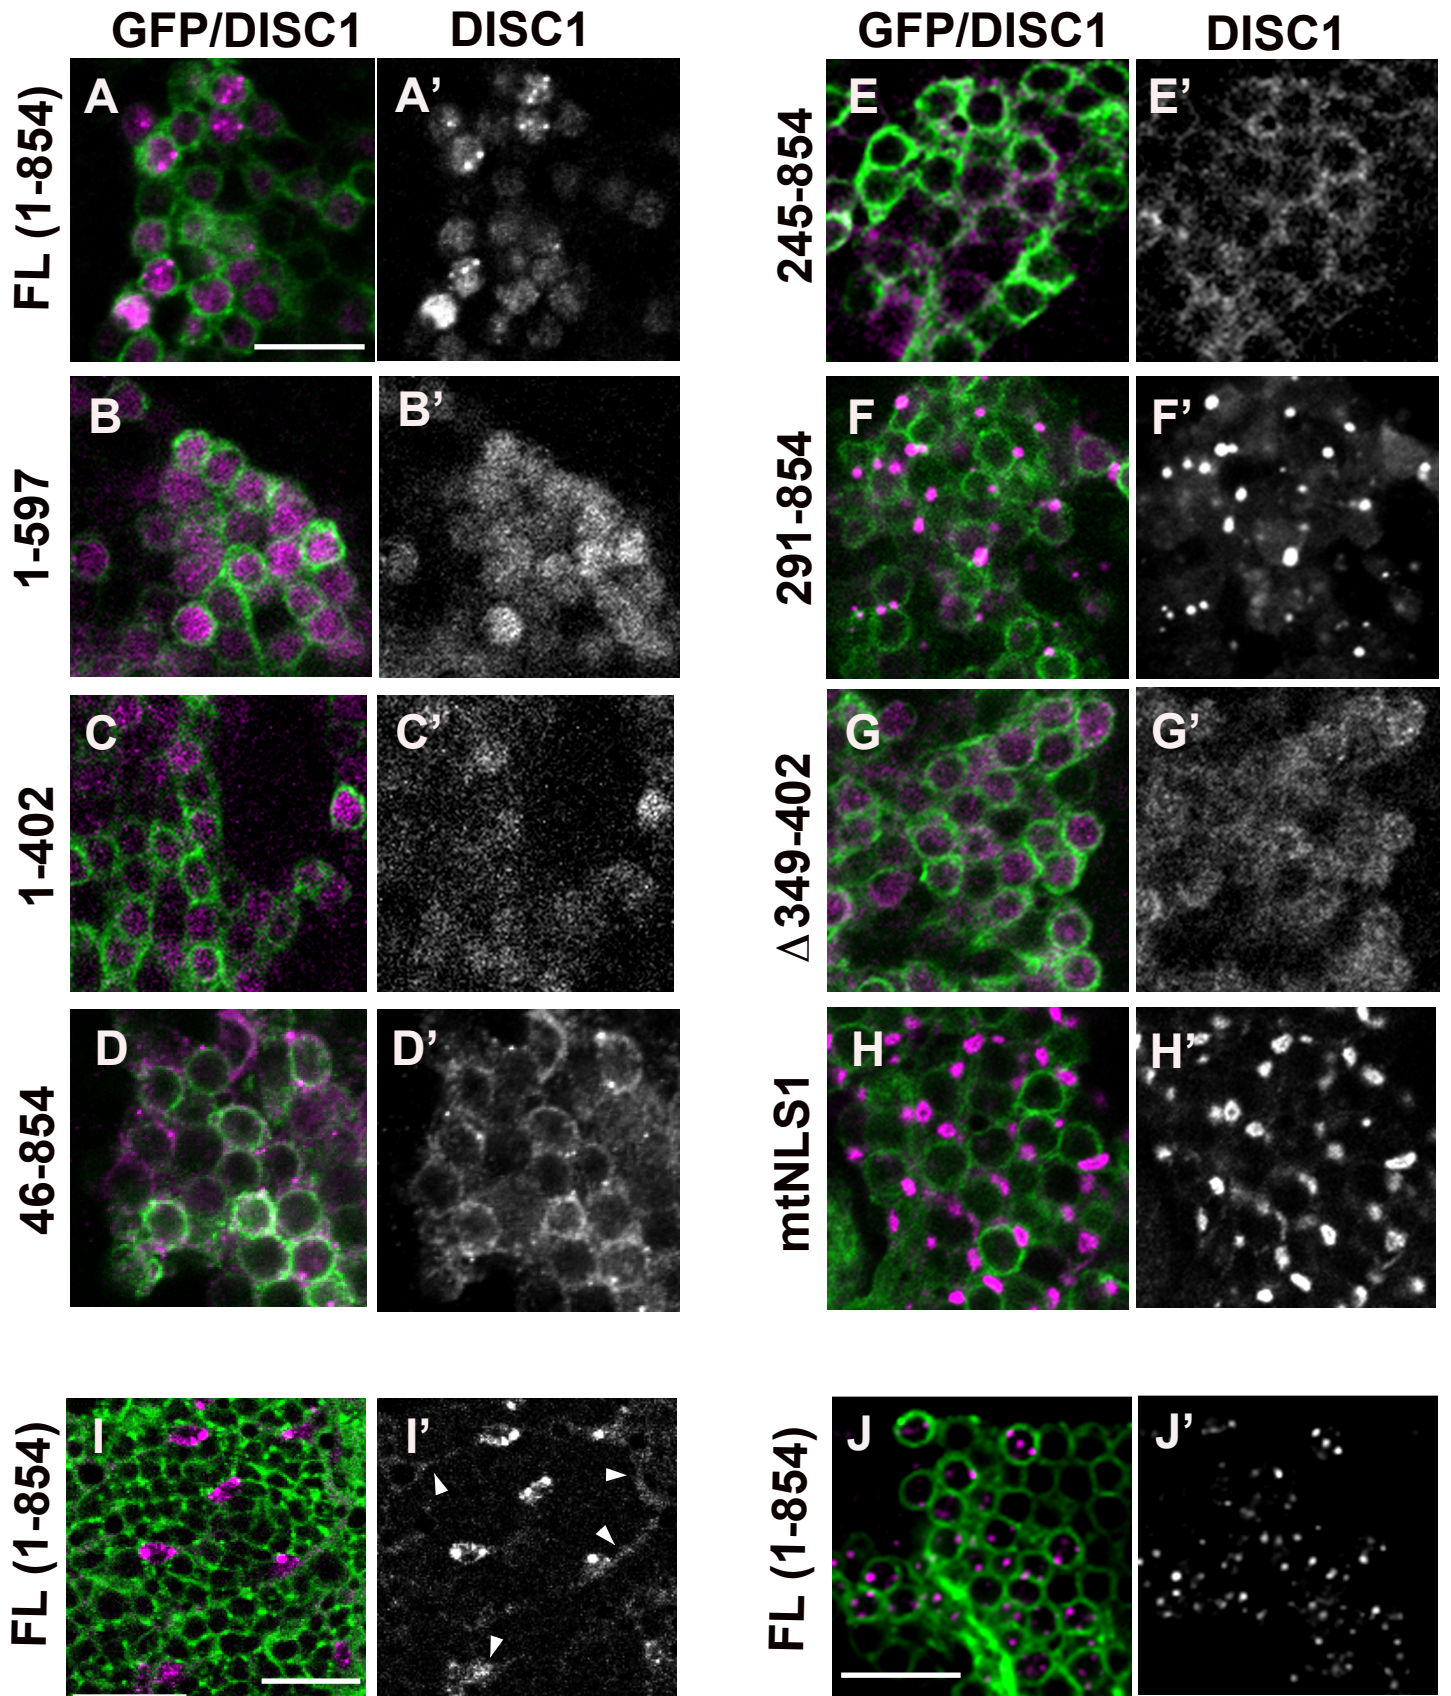

Figure S2



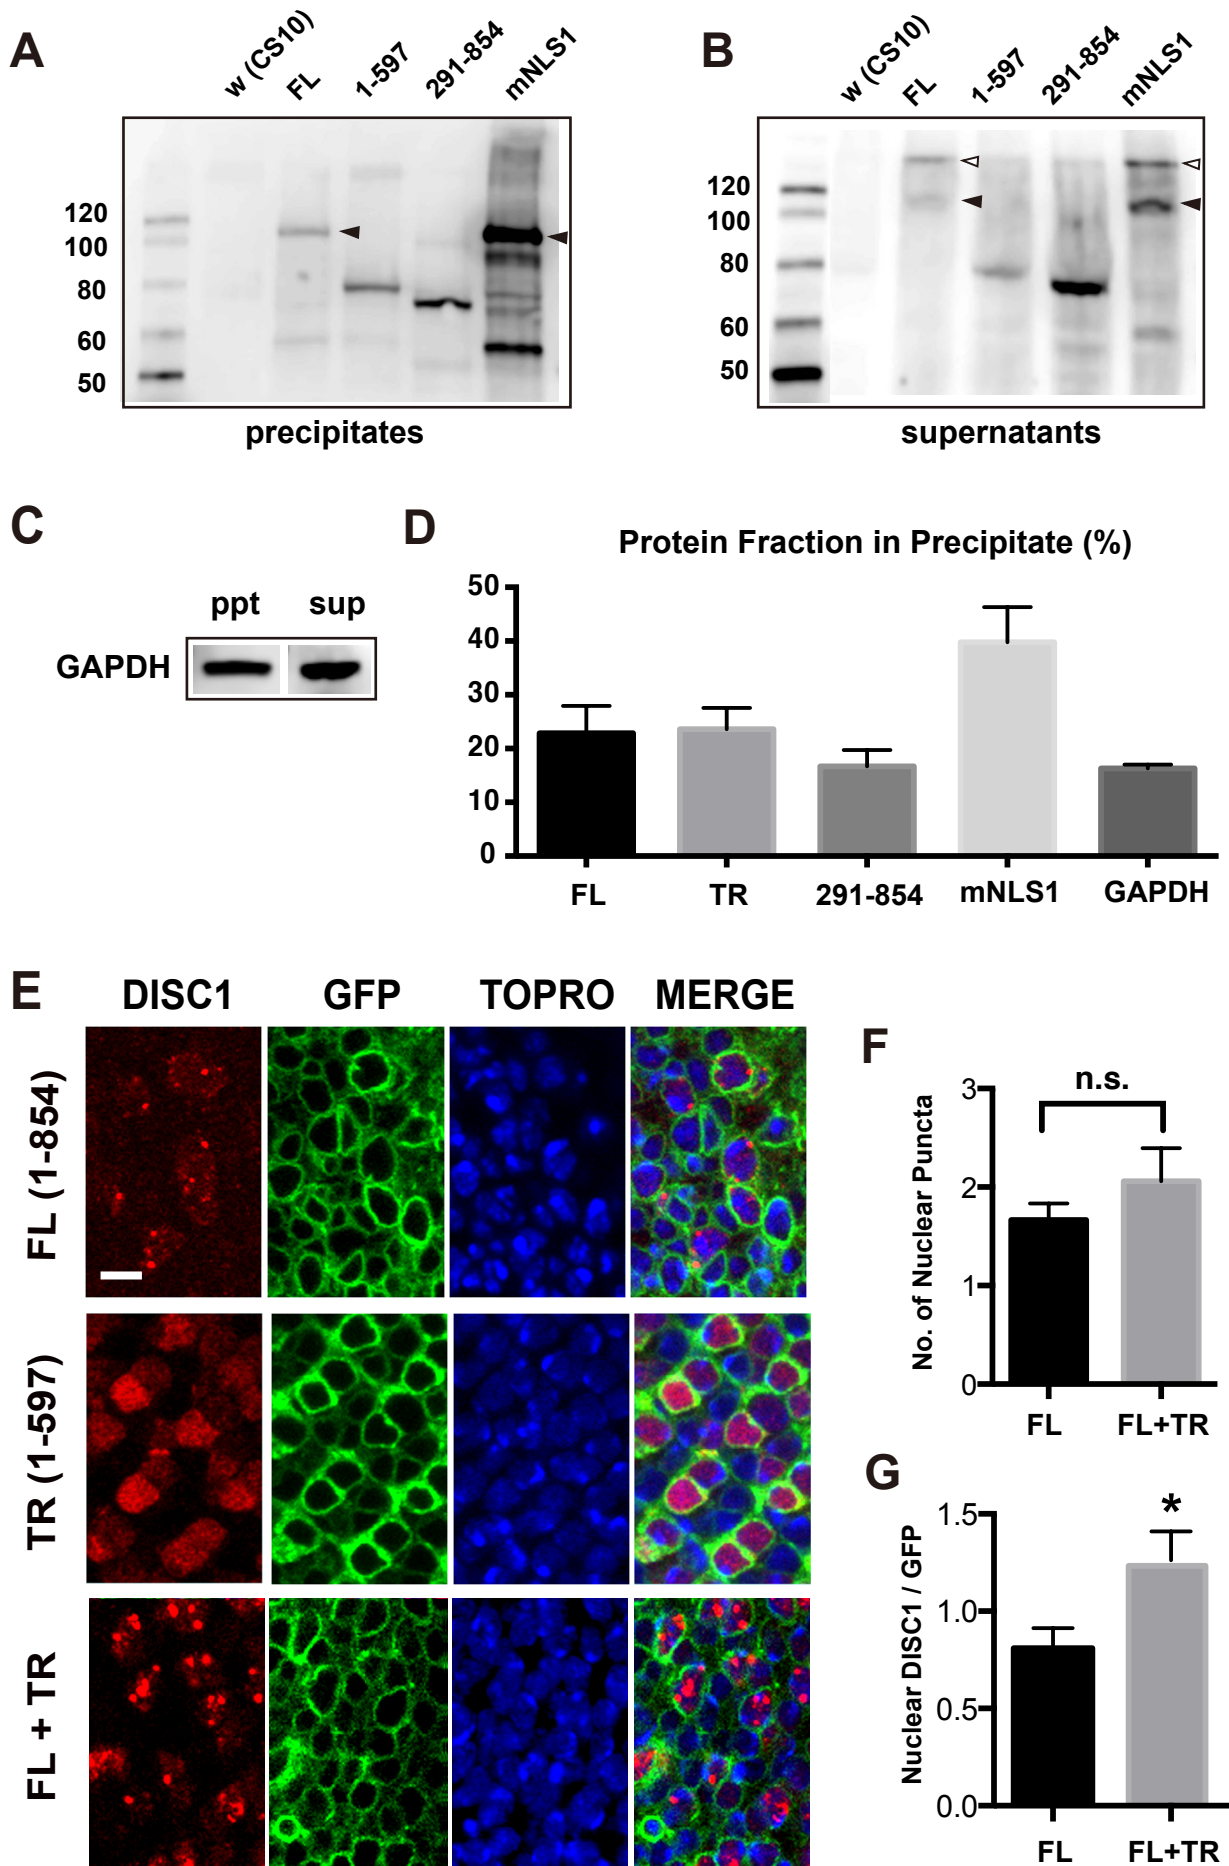

Figure S3

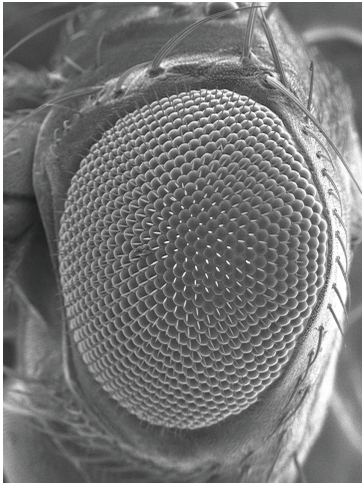

**Wild type  
(3 days)**

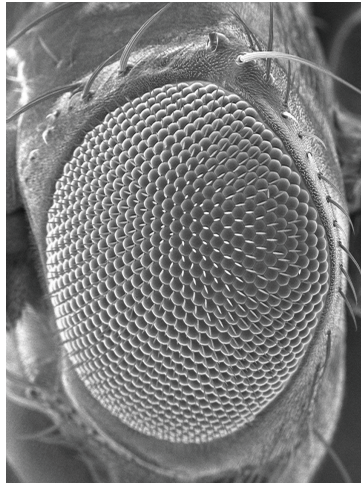

**DISC1 FL (1-854)  
(35 days)**

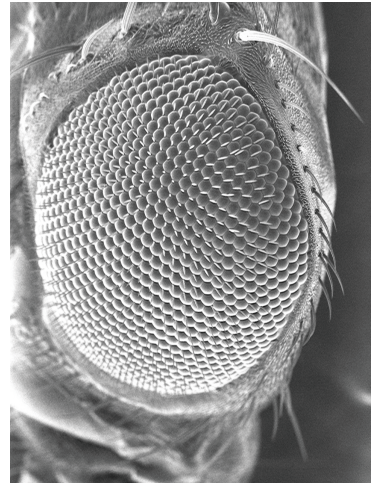

**DISC1 TR (1-597)  
(35 days)**

**Figure S4**

## Supplementary Information

### Legends to Supplementary Figures

#### Figure S1. Expression of full-length and mutant DISC1 proteins in larval MB neurons.

A. DISC1 (magenta) was expressed using a MB-GAL4 driver, *201Y*. Cells were labeled with a membrane-bound marker, *UAS-mCD8::GFP* (green). Third instar larval stage. Kc (Kenyon cells): the cell bodies. Cx (calyx): the dendritic structure. Lb (lobe): the axonal extensions. Full-length DISC1 protein was detected in the cell bodies. By contrast, mutant proteins (46-854, 245-854, 291-854 and mtNLS1) were detected in the cell bodies as well as the lobes and the calyx. Trace axonal and dendritic localization was also noticed for mutant proteins 1-597. Arrowheads indicate expression in the calyx. Anti-DISC1 antibody (Lys101-Arg260) was used for 46-854, 245-854, 291-854, and anti-DISC1 antibody (carboxyl terminal) was used for FL (1-854), 1-597, 1-402,  $\Delta$ 349-402 and mtNLS1. Scale bar in A, 50  $\mu$ m.

B. Relative expression levels of full-length and mutant DISC1 proteins in larval MB neurons. DISC1 expression levels in the Kenyon cells were quantitated based on fluorescence intensities. Signals were standardized against the intensities of *UAS-mCD8::GFP*, which was driven alongside with *UAS-DISC1* by the same GAL4 driver. \* $p < 0.05$ , \*\*\* $p < 0.001$  with ANOVA and Dunnett's post hoc test against FL (1-854),  $n = 10$ .

#### Figure S2. Subcellular localization of intact and mutant DISC1 proteins in larval MB neurons.

A-H. Subcellular localization patterns of the intact and mutant DISC1 proteins in larval MB neurons. The intact DISC1 protein FL (1-854) exhibited punctate dots in many of the nuclei. FL (1-854) also showed diffuse pattern in the nucleus and the surrounding thin perinuclear cytoplasm. Mutant proteins, 1-597, 1-402 and  $\Delta$ 349-402, showed diffuse nuclear pattern. Mutant proteins, 46-854, 245-854, 291-854, and mtNLS1, showed cytoplasmic localization, consistent with lack of the nuclear localization signal. Note that mutant proteins, 291-854 and mtNLS1, exhibited punctate accumulation in the perinuclear cytoplasm. Similar but weaker perinuclear punctates were also observed for the protein 46-854. DISC1 (magenta) was expressed with a MB-GAL4 driver, *201Y*. Green, *mCD8::GFP*. Scale bar in A, 10  $\mu$ m.

I. Localization of the intact DISC1 protein FL (1-854) in larval glia cells. Note localization in cytoplasmic processes (arrowheads). DISC1 (magenta) was expressed using a glia-specific driver, *Repo-GAL4*. Green, anti-HRP-FITC staining highlighting the cytoplasm. Scale bar, 20  $\mu$ m.

J. Nuclear localization of the intact DISC1 protein FL (1-854) in the adult MB neurons. Note DISC1 is exclusively localized to the nuclei as punctates.

#### Figure S3. Solubility of intact and mutant DISC1 proteins.

A, B. Western blotting of larval proteins in Sarkosyl insoluble (A) and soluble fractions (B). Arrowhead, protein band corresponding to the full-length DISC1. Open arrowhead in B, high molecular weight band containing DISC1. HA-tag DISC1 proteins were expressed with a ubiquitous

## Supplementary Information

driver, *tub-P-GAL4*. Proteins were extracted from third instar larvae, separated with 10% SDS gel, and detected with an anti-HA antibody. Note that three times more extracts were loaded in the lanes of A for better detection.

C. Recovery of GAPDH in the Sarkosyl insoluble precipitate (ppt) and supernatant (sup) fractions. Proteins were extracted from *w* (*CSI0*) third instar larvae, separated with 10% SDS gel and detected with an anti-GAPDH antibody. Note that three times more extracts were loaded in the precipitate lane.

D. Relative insolubility of the full-length and mutant DISC1 proteins. Percent protein fractions in the precipitate are shown as ppt / (ppt + sup) ratios. Proteins levels were determined as the intensities of the Western blotting data measured by Image J. Data are indicated as the means  $\pm$  SEM of three samples.

E. DISC1 (red) was expressed using a compound eye driver, *GMR-GAL4*. Cells were labeled with a membrane-bound marker, *UAS-mCD8::GFP* (green). Late third instar larval stage. The intact DISC1 protein FL (1-854) exhibited punctate dots in many of the nuclei with moderate diffuse staining. By contrast, the truncated protein TR (1-597) was detected in a diffuse pattern. Co-expression of FL (1-854) and TR (1-597) proteins resulted in prominent punctates in the nuclei. Scale bar, 4  $\mu$ m.

F. Number of nuclear puncta in FL and FL+TR eye primordia cells. No puncta was formed in the cells expressing only TR (1-597).

G. Relative expression levels of FL and FL+TR eye primordia cells. Note significant increase in the nuclear DISC1 level in the FL+TR cells. DISC1 expression levels were quantitated based on fluorescence intensities. Signals were standardized against the intensities of *UAS-mCD8::GFP*, which was driven alongside with *UAS-DISC1* by the same *GAL4* driver. \* $p < 0.05$  with t-test,  $n = 8-10$ .

### **Figure S4. Compound eyes of aged flies with DISC1 overexpression.**

Scanning microscopy. FL (1-854) or TR (1-597) DISC1 was overexpressed using a compound eye driver, *GMR-GAL4*, for five weeks (35 days).
